# Supplementary material for: Jagged1 expression by osteoblast-lineage cells regulates trabecular bone mass and periosteal expansion in mice
Source: PubMed Central journal article supplement — Bone. Author manuscript; Available in PMC 2017 Aug 31. (PMC5578473; doi:10.1016/j.bone.2016.07.006), 2016-07-12
Supplement: NIHMS899079-supplement-Supplemental.pdf [file NIHMS899079-supplement-Supplemental.pdf]

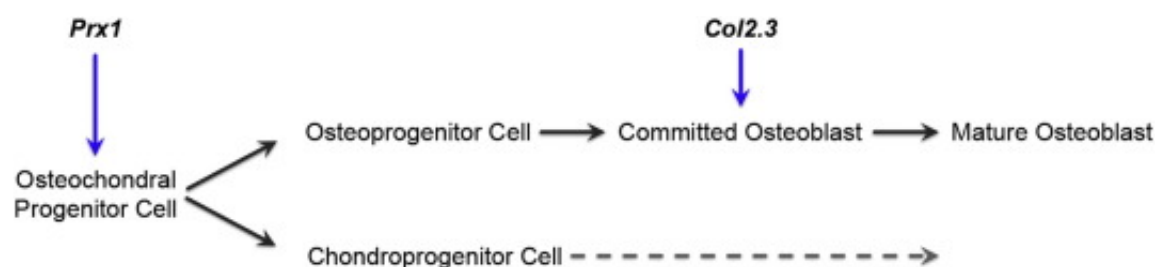

[Download high-res image \(47KB\)](#) [Download full-size image](#)

Supplemental Fig. 1. Schematic depicting *Prx1* and *Col2.3* expression as markers of osteochondral lineage differentiation. *Prx1* is first expressed in undifferentiated osteochondral progenitor cells. Cre will be expressed in cells of the early mesenchyme, and all of their progeny, including osteoblasts and osteocytes, will lack *Jag1*. *Col2.3* is first expressed in committed osteoblasts, so osteoblasts and osteocytes will have *Jag1* disrupted.

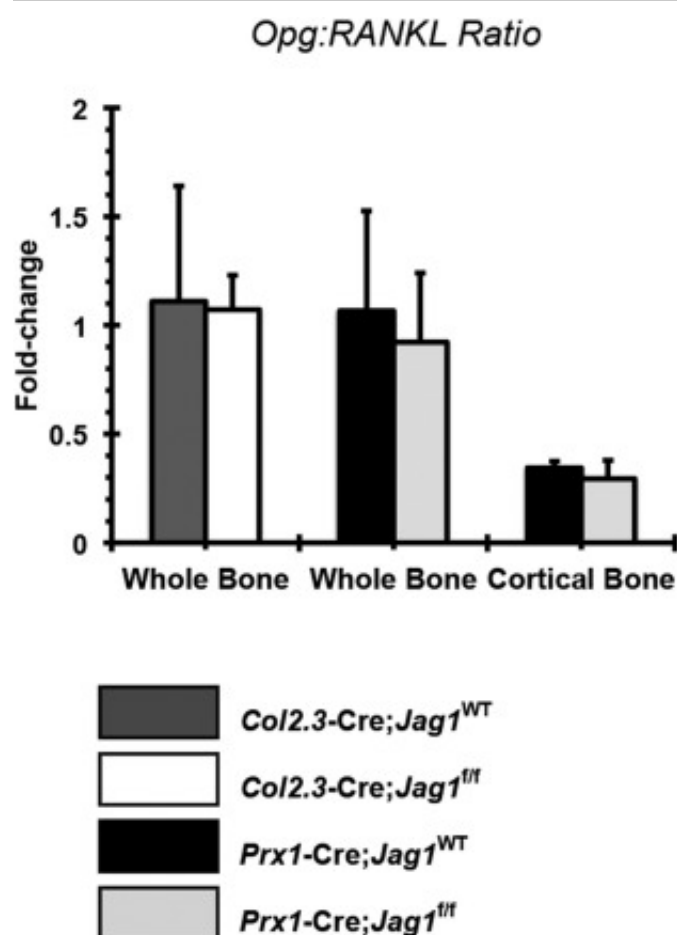

[Download high-res image \(88KB\)](#) [Download full-size image](#)

Supplemental Fig. 2. Gene expression of proliferation markers cyclin D1 (*CcnD1*) and proliferating cell nuclear antigen (*PCNA*). Data are presented as fold change expression to each genotype's respective whole bone (*Prx1-Cre; Jag1<sup>flf</sup>* or *Col2.3-Cre; Jag1<sup>flf</sup>*) calculated using the formula  $2^{-\Delta\Delta C(t)}$  (\*p < 0.050,

#p < 0.100).

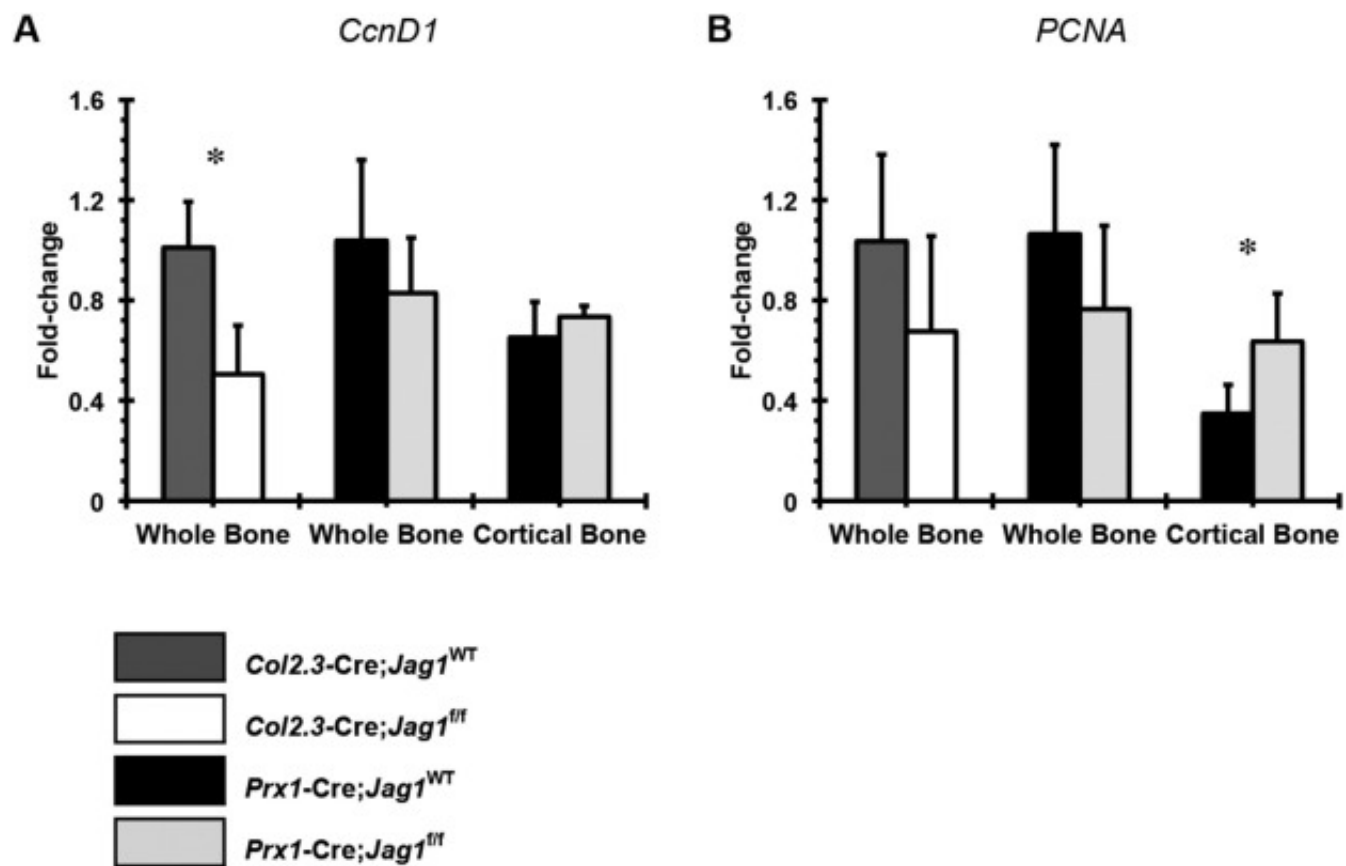

[Download high-res image \(127KB\)](#)    [Download full-size image](#)

Supplemental Fig. 3. Results of CFU-F assays for marrow-derived cells from WT and *Prx1-Cre;Jag1*<sup>f/f</sup> mice. Marrow-derived cells from *Prx1-Cre;Jag1*<sup>f/f</sup> mice form more colonies *in vitro* (n = 11, \*p < 0.050).

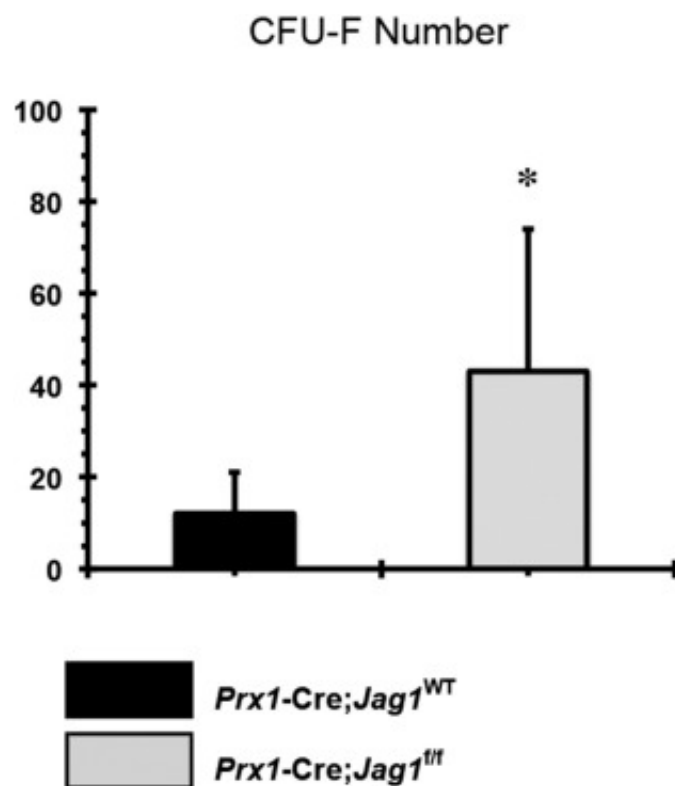

[Download high-res image \(53KB\)](#)

[Download full-size image](#)

Supplemental Fig. 4. Ratio of relative changes in gene expression of osteoblast mediators of osteoclast activity *RANKL* and *Opg* show no significant differences.

---

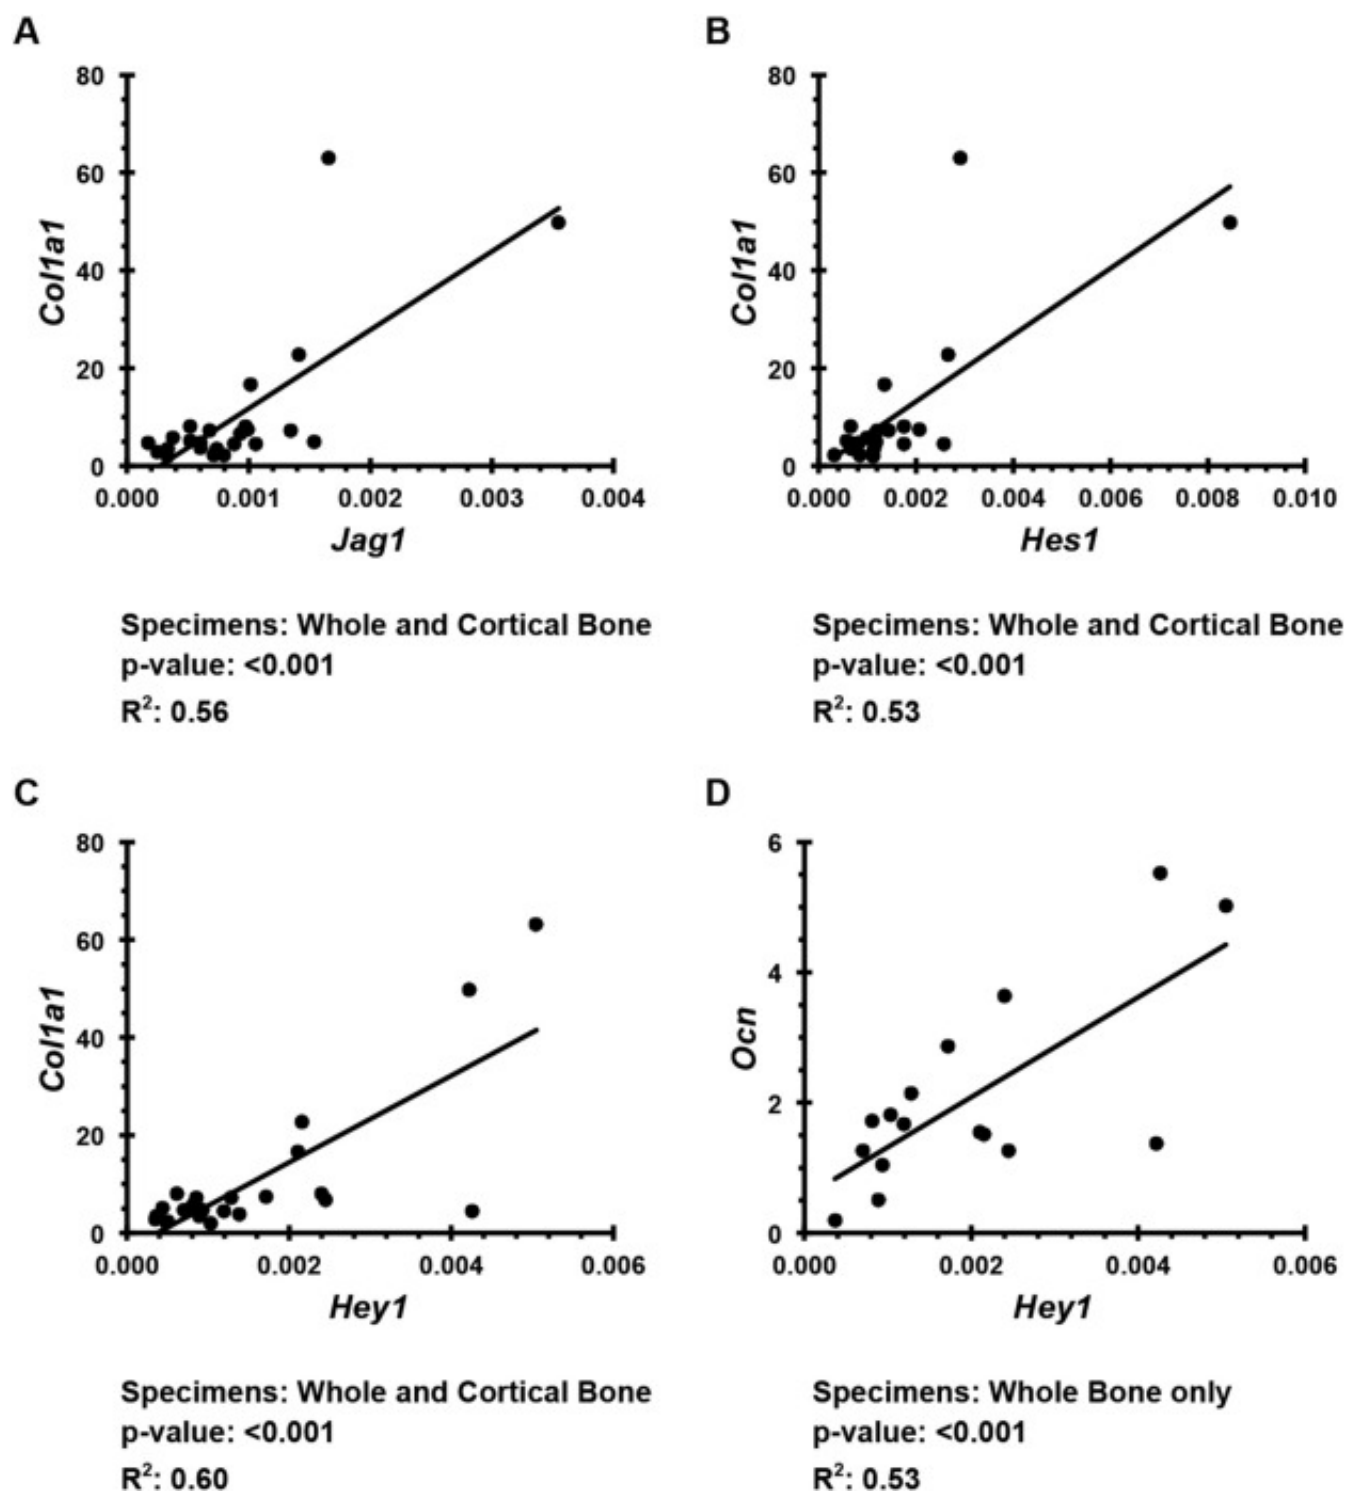

[Download high-res image \(230KB\)](#)    [Download full-size image](#)

Supplemental Fig. 5. Linear correlation of Notch components (*Jag1*, *Hes1*, *Hey1*) with osteogenic markers (*Col1a1*, *Ocn*). Data are presented as relative expression to  $\beta$ -actin calculated using the formula  $2^{-\Delta\Delta C(t)}$ .

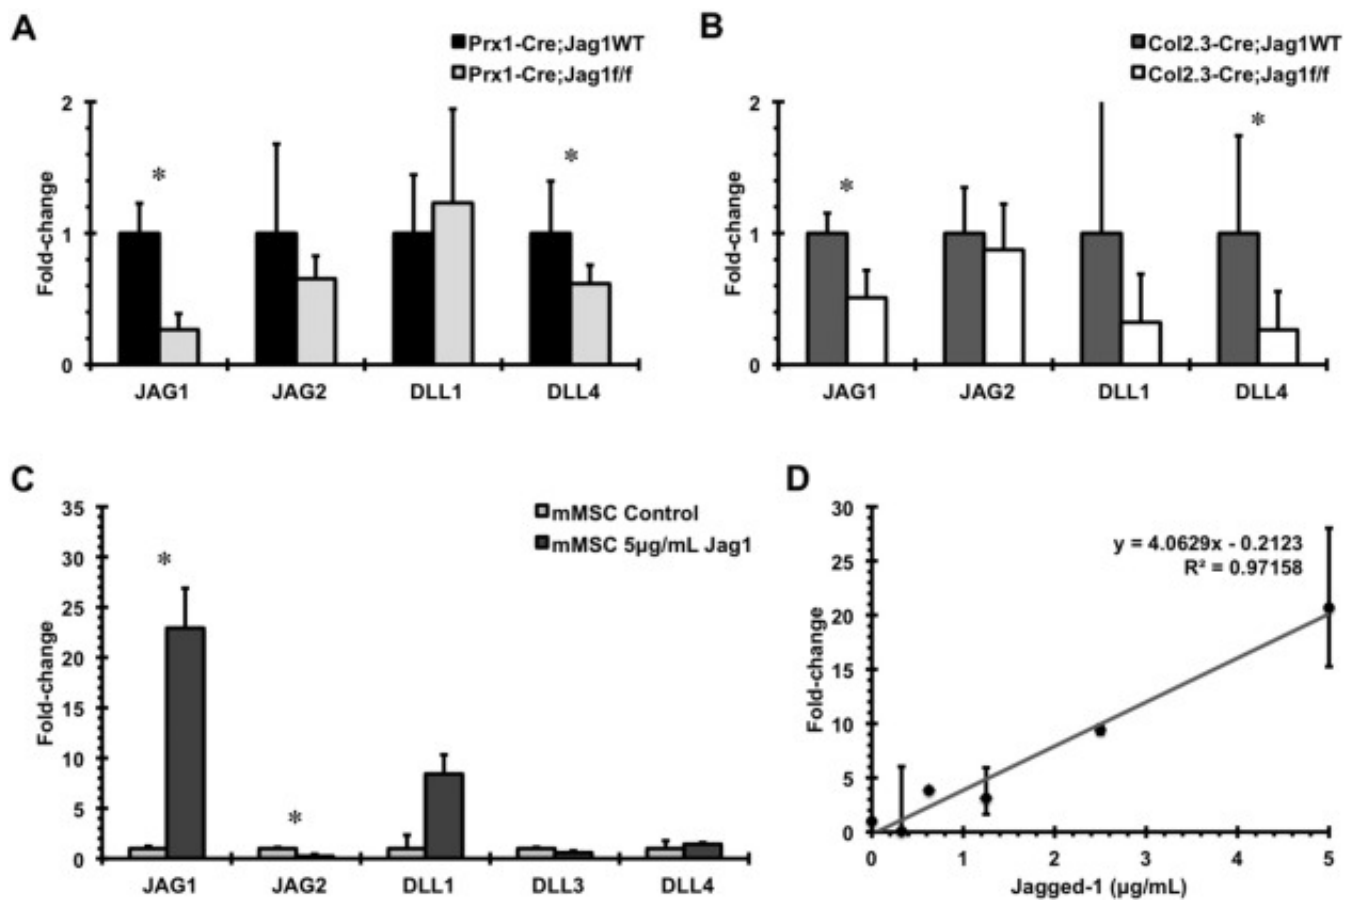

[Download high-res image \(145KB\)](#) [Download full-size image](#)

Supplemental Fig. 6. Whole-bone gene expression of Notch ligands following Jag1 knockout and mMSC gene expression following activation with Jag1. *DLL4* expression is co-downregulated with *Jag1*  $0.62 \pm 0.14$ -fold in *Prx1-Cre;Jag1<sup>ff/f</sup>* mice ( $p = 0.048$ ) and  $0.26 \pm 0.29$ -fold in *Col2.3-Cre;Jag1<sup>ff/f</sup>* mice ( $p = 0.041$ ) *in vivo*. Expression of other ligands is unchanged (*DLL3* not detected). Jag1-stimulated mMSCs demonstrate a dose-dependent upregulation of *Jag1*. At a dose of 5 µg/mL, *Jag1* is upregulated 22.9-fold, while *Jag2* is downregulated 0.24-fold. Statistical analysis was not performed on this pilot mMSC data, which represents a single pool of cells per group (error bars represent values from technical replicates). All data are presented as relative expression to  $\beta$ -actin calculated using the formula  $2^{-\Delta\Delta C(t)}$  (\* $p < 0.050$ ).
